# Supplementary material
Source: PubMed Central journal article supplement (PMC2825470)
Supplement: supp_M109.093237_jbc.M109.093237-2.pdf [file supp_M109.093237_jbc.M109.093237-2.pdf]

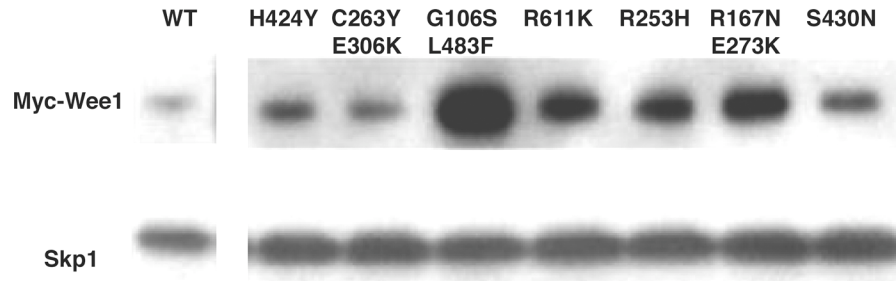

| Base Pair Location | Original Codon | Mutant Codon | Resulting Amino Acid Mutation |
|--------------------|----------------|--------------|-------------------------------|
| 500                | CGG            | CAG          | R167N                         |
| 817                | GAG            | AAG          | E273K                         |
| 758                | CGT            | CAT          | R253H                         |
| 788                | TGT            | TAT          | C263Y                         |
| 907                | GAG            | AAG          | E306K                         |
| 1270               | CAC            | TAC          | H424Y                         |
| 1275               | ATG            | ATA          | M425I                         |
| 1289               | AGT            | AAT          | S430N                         |
| 316                | GGC            | AGC          | G106S                         |
| 1447               | CTT            | TTT          | L483F                         |
| 190                | CCC            | TCC          | P64S                          |
| 1478               | ACA            | ATA          | T493I                         |
| 1487               | CCA            | CAA          | P496Q                         |
| 1832               | AGA            | AAA          | R611K                         |

Supplemental Figure S2
