# Supplementary material
Source: PubMed Central journal article supplement (PMC2825470)
Supplement: supp_M109.093237_jbc.M109.093237-5.pdf [file supp_M109.093237_jbc.M109.093237-5.pdf]

MSFLSRQQPPPPRRAGAACTLRQKLIFSPCSDCEEEEEEEEEEGSGHSTG 50  
 ++++++

ED**S**AFQEPDSPLPPARSPTEPGPERRRSPGPAPGSPGELEEDLLLPGACP 100  
 ++++++ + ++++++

GADEAGGGAEGDSWEEEGFGSS**S**PVKSPAAPYFLGSSFSPVRCGGPGDAS 150  
 ++++++

PRGCGARRAGEGRRSPRPDHPGTPPHKTFRKLRLFDTPHTPKSLLSKARG 200

IDSSSVKLRGSSLFMDTEKSGKREFDVRQTPQVNINPFTPDSLLLHSSGQ 250  
 -----

CRRRKRTYWNDSCGEDMEASDYELEDETRPAKRITITESNMKSRYTTEFH 300

ELEKIGSGEFGSVFKCVKRLDGCYAIKRSSKPLAGSVDEQNALREVYAH 350  
 -----

AVLGQHSHVVRYFSAWAEDDHMLIQNEYCNGGSLADAISENYRIMSYFKE 400

AELKDLLLQVGRGLRYIHMSLVHMDIKPSNIFISRTSIPNAASEEGDED 450  
 ++++++

DWASNKVMFKIGDLGHVTR**SS**PQVEEGD**S**R**F**LANEVLQENYTHLPKADI 500  
 ++++++ -----

FALALTVVCAAGAEPLPRNGDQWHEIRQGRLPRIPQVLSQEFTELLKVM 550  
 -----

HPDPERRPSAMALVKHSVLLSASRKSAEQLRIELNAEKFKNSLLQKELKK 600

AQMAKAAAEERALFTDRMATRSTTQSNRTSRLIGKKMNRSVSLTIY 646

Supplemental Figure S6
