# Supplementary material
Source: PubMed Central journal article supplement (PMC2825470)

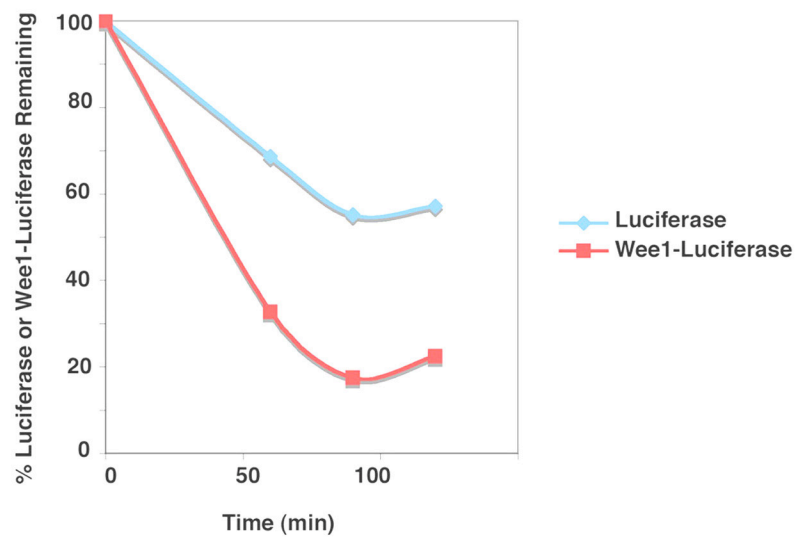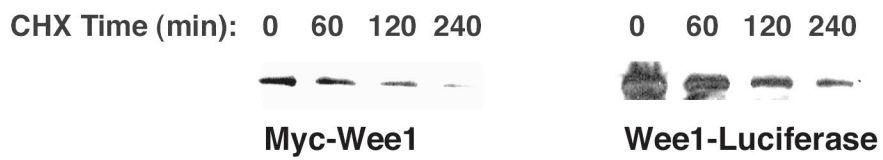

**Supplemental Figure S1**

Supplement: supp_M109.093237_jbc.M109.093237-1.pdf [file supp_M109.093237_jbc.M109.093237-1.pdf]

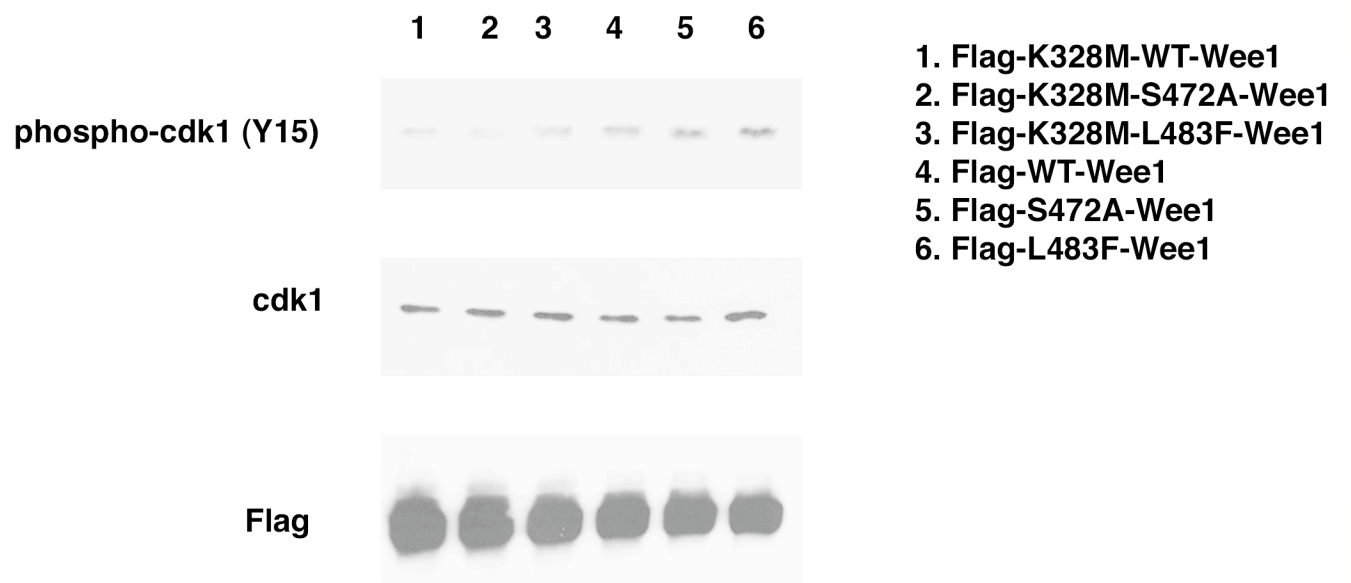

Supplemental Figure S4

Supplement: supp_M109.093237_jbc.M109.093237-3.pdf [file supp_M109.093237_jbc.M109.093237-3.pdf]

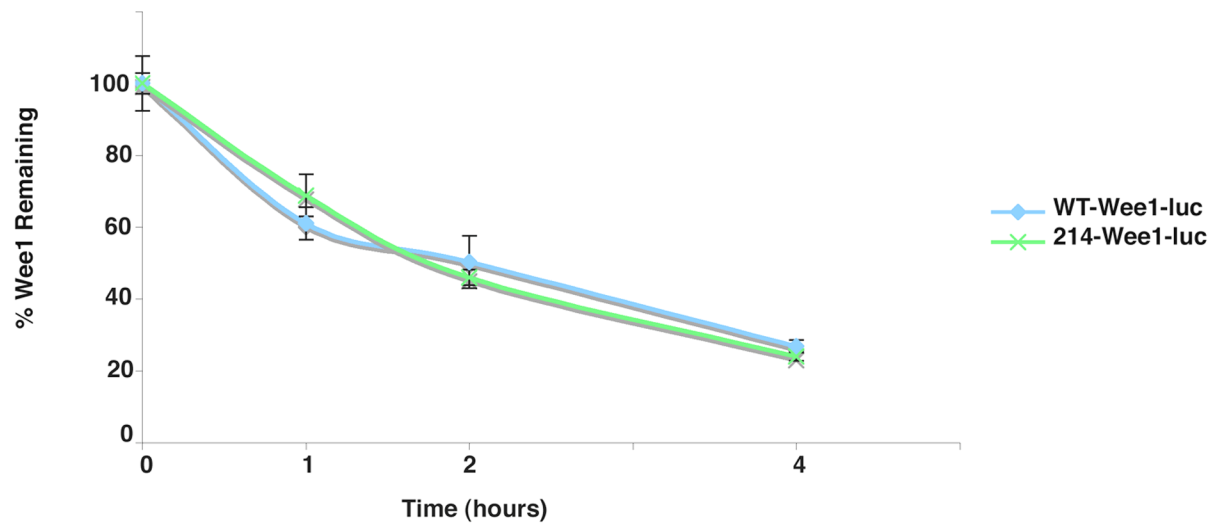

Supplemental Figure S5

Supplement: supp_M109.093237_jbc.M109.093237-4.pdf [file supp_M109.093237_jbc.M109.093237-4.pdf]

A.

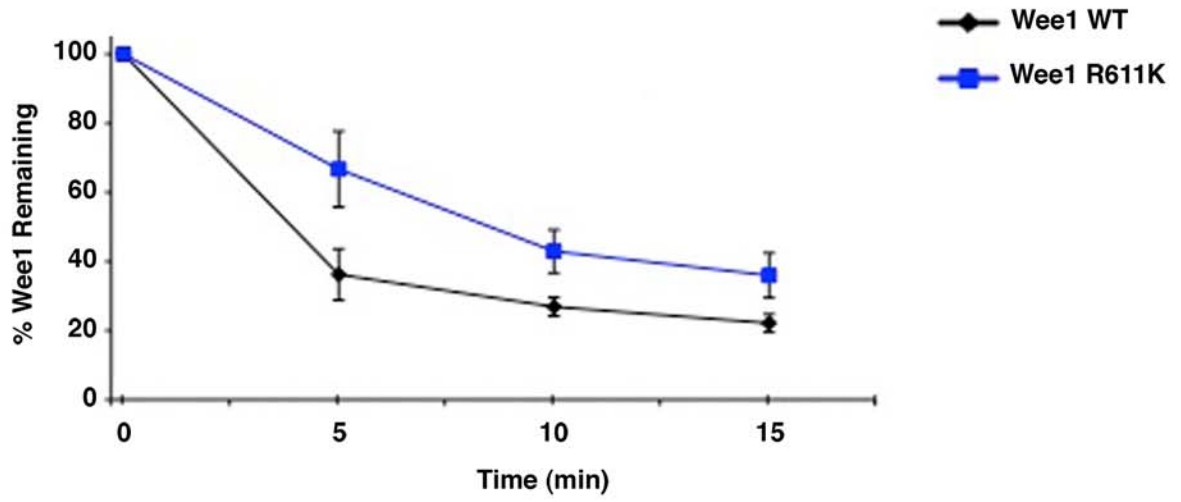

B.

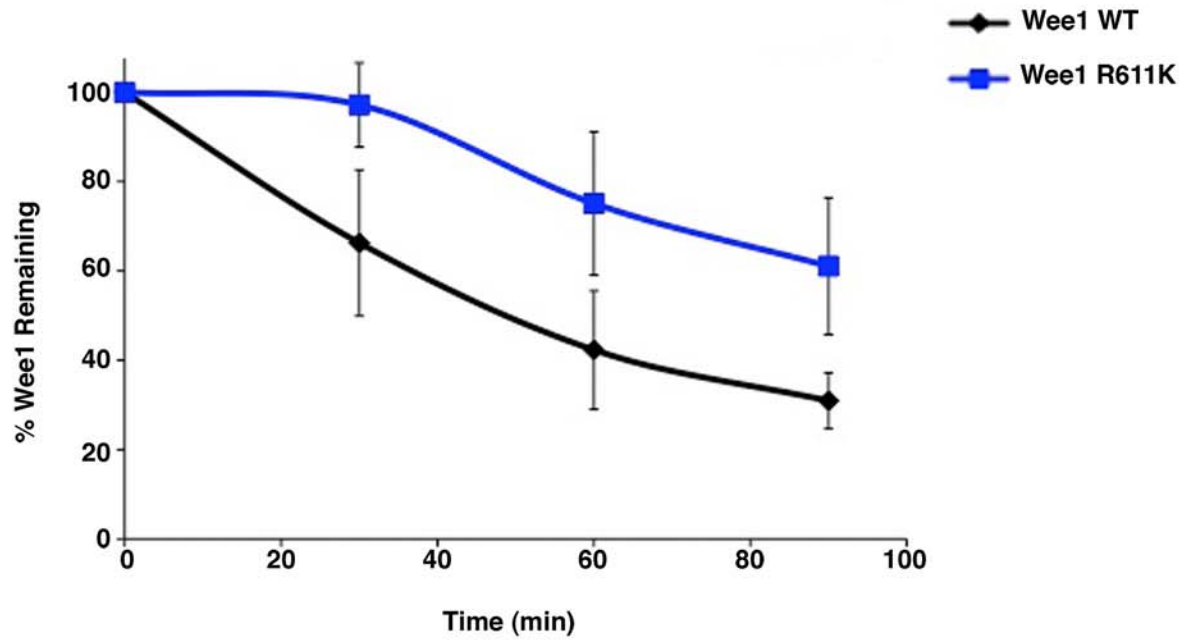

Supplement: supp_M109.093237_jbc.M109.093237-6.pdf [file supp_M109.093237_jbc.M109.093237-6.pdf]

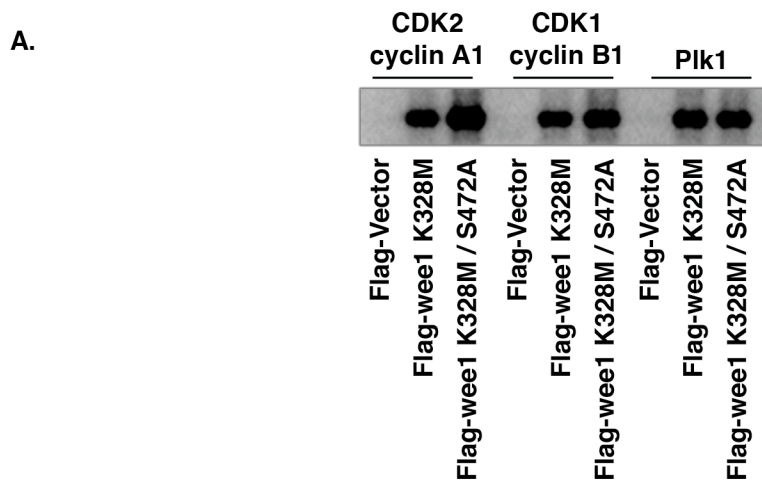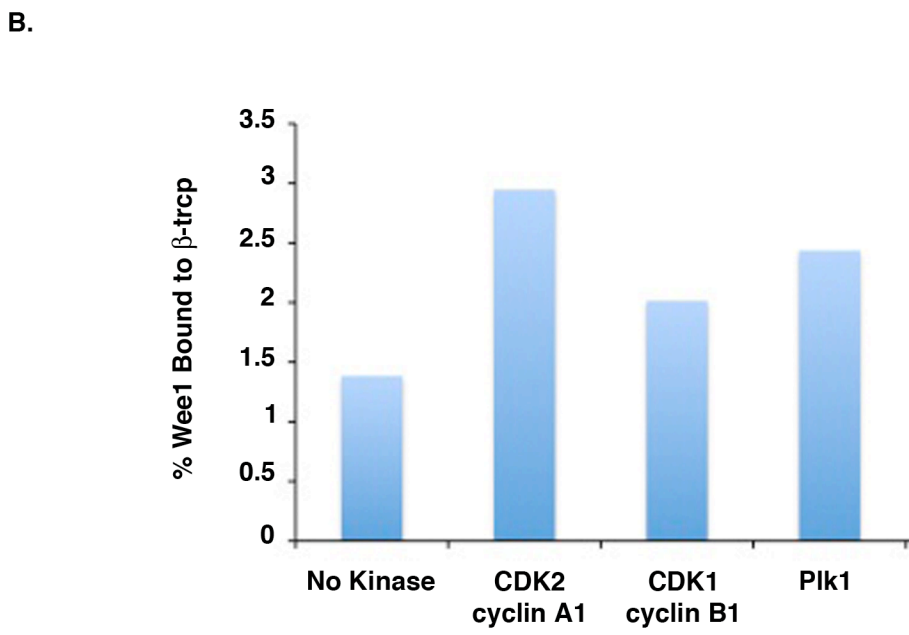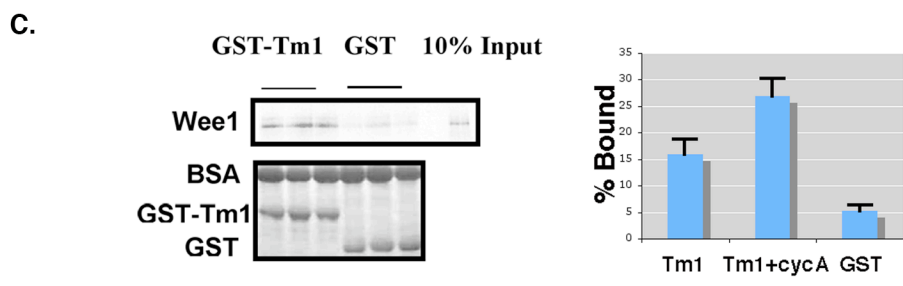

Owens et al., Supplemental Figure S8

Supplement: supp_M109.093237_jbc.M109.093237-7.pdf [file supp_M109.093237_jbc.M109.093237-7.pdf]
